# Supplementary material for: Metabolomic Profiling and Molecular Networking of Nudibranch-Associated Streptomyces sp. SCSIO 001680
Source: MDPI journal article supplement (doi:10.3390/molecules27144542), 2022-07-16
Supplement: s1 [file s1]

# Metabolomic Profiling and Molecular Networking of Nudibranch-Associated *Streptomyces* sp. SCSIO 001680

Samar M. Abdelrahman <sup>1,2,\*</sup>, Noura S. Dosoky <sup>3</sup>, Amro M. Hanora <sup>4</sup> and Nicole. B. Lopanik <sup>1,5,6</sup>

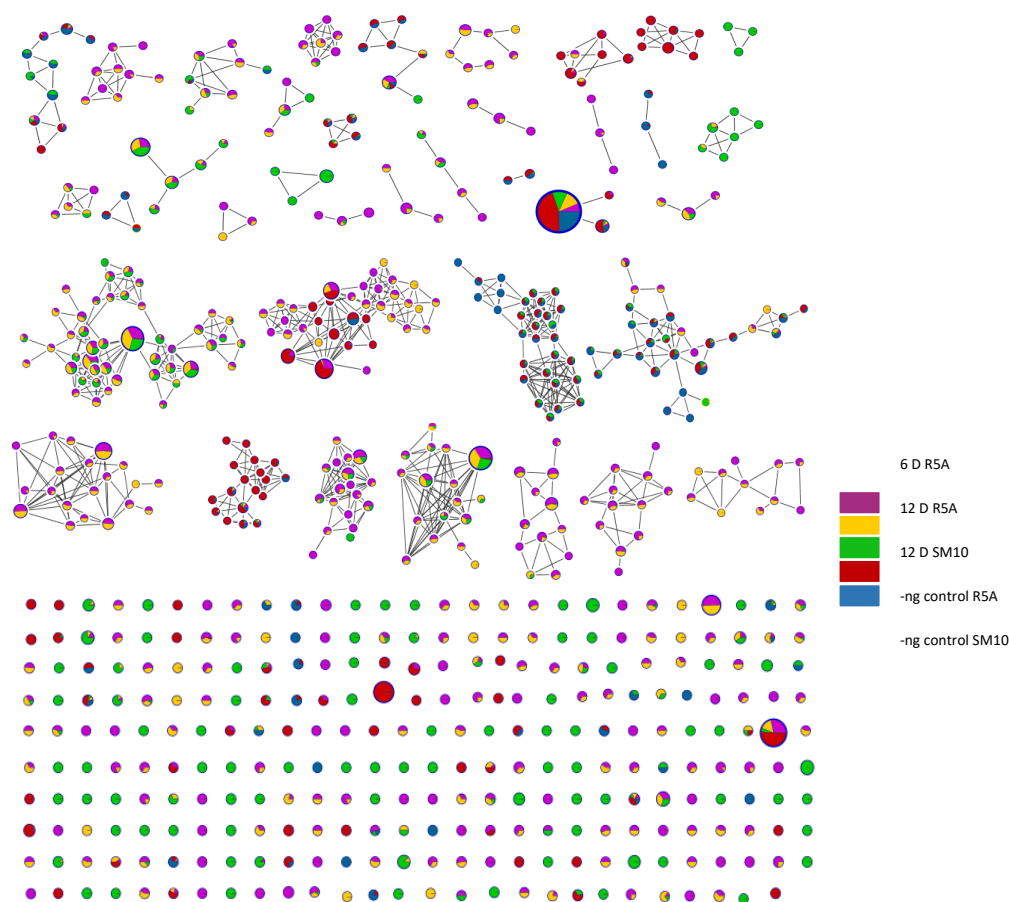

**Figure S1.** Molecular network of metabolites produced by *Streptomyces* sp. SCSIO 001680 generated by Cytoscape 3.7.2.

**Table S1.** Spectral information (LC-MS/MS data) for compounds identified through GNPS. For all compounds: Ion source: LC-ESI; MS-Level: MS2; Instrument: qTOF; Ionization mode: Positive; MS Category: Experimental

| Compound           | MoNA ID            | Exact Mass | Precursor Type      | Precursor m/z | Top 5 peaks                                              |
|--------------------|--------------------|------------|---------------------|---------------|----------------------------------------------------------|
| Marineosin A       | CCMSLIB00000001623 | 409.2837   | M+H                 | 410.2909      | 393.2656<br>361.2434<br>333.2522<br>319.2020<br>291.2099 |
| Desferrioxamine E  | CCMSLIB00000001622 | 600.348    | M+Na                | 623.339       | 601.3568<br>201.1657<br>183.1604<br>102.1711<br>84.1714  |
| Desferrioxamine D2 | CCMSLIB00004698381 | 586.3326   | [M+Na] <sup>+</sup> | 609.322       | 509.31<br>409.22<br>309.21<br>223.14<br>123.09           |
| Deferoxamine       | CCMSLIB00005435927 | 560.353    | M+H                 | 561.3634      | 561.3634<br>319.2555<br>243.1670<br>201.1656<br>102.1716 |
| Bisucaberin        | CCMSLIB00005724304 | 400.232    | M+H                 | 401.25        | 401.2513<br>301.1620<br>201.1663<br>165.1553<br>102.1715 |

**Table S2.** Spectral information for compounds dereplicated on Marinlit. For all compounds: Ion source: LC-ESI; MS-Level: MS2; Instrument: qTOF; Ionization mode: Positive; MS Category: Experimental.

| Compound                 | Energy level | Precursor Type     | Precursor m/z | Exact Mass | Top 5 peaks                                                   |
|--------------------------|--------------|--------------------|---------------|------------|---------------------------------------------------------------|
| Halichoblelide           | 2            | [M+H] <sup>+</sup> | 1039.5786     | 1038.5763  | 1039.5786<br>1021.5662<br>955.5907<br>977.5794<br>959.5669    |
| Streptodepsipeptide P11B | 2            | [M+H] <sup>+</sup> | 1083.6068     | 1082.5999  | 1083.6068<br>1065.5952<br>1039.6166<br>1021.6066<br>1003.5950 |
| Alternarin A             | 0            | [M+H] <sup>+</sup> | 495.2402      | 494.2338   | 495.2402<br>309.1772<br>189.1803<br>126.1707<br>84.1720       |
| Alexandrolide            | 0            | [M+H] <sup>+</sup> | 528.3527      | 527.3458   | 528.3527<br>510.3418<br>212.1471<br>196.1563<br>156.1374      |
| Pachastrelloside A       | 1            | [M+H] <sup>+</sup> | 783.4519      | 782.4452   | 721.4529<br>407.2175<br>331.2093<br>137.1232                  |
| Didemnaketal F           | 0            | [M+H] <sup>+</sup> | 853.4938      | 852.4871   | 835.4829<br>725.4085<br>707.3994<br>675.3744<br>319.2104      |
